# Supplementary material
Source: Royal Society of Chemistry journal article supplement (doi:10.1039/d6nj00915h)
Supplement: d6nj00915h1.pdf [file d6nj00915h1.pdf]

# **Investigation of Silicone Hydrogel Contact Lenses Functionalized with Hollow Silica Nanoparticles for Drug Loading**

Yishan Hou<sup>1</sup>, Wenzhuo Cao<sup>1</sup>, Yuting Peng<sup>1</sup>, Juan Huang<sup>1</sup>, Yanli Li<sup>\*1,2</sup>, Yong Jiang<sup>\*1</sup>

1. School of Chemistry and Chemical Engineering, Southeast University, Jiangning, Nanjing, Jiangsu, 211189, P. R. China. E-mail: jy@seu.edu.cn

2. School of Pharmaceutical and Chemical Engineering, Southeast University Chengxian College, Nanjing, Jiangsu Province, 210088. P. R. China. E-mail: lylsuccesssun@126.com

**Table S1.** Formulation of HSN-SCL lenses

| Sample                   | PDMS-PU<br>(wt%) | SIGMA<br>(wt%) | DMA<br>(wt%) | NVP<br>(wt%) | PEGMA<br>(wt%) | HSN<br>(wt%) |
|--------------------------|------------------|----------------|--------------|--------------|----------------|--------------|
| SCL                      | 30               | 30             | 20           | 10           | 10             | 0            |
| HSN <sub>30</sub> -SCL-1 | 30               | 30             | 20           | 10           | 10             | 0.5          |
| HSN <sub>30</sub> -SCL-2 | 30               | 30             | 20           | 10           | 10             | 1.0          |
| HSN <sub>30</sub> -SCL-3 | 30               | 30             | 20           | 10           | 10             | 1.5          |
| HSN <sub>30</sub> -SCL-4 | 30               | 30             | 20           | 10           | 10             | 2.0          |
| HSN <sub>30</sub> -SCL-5 | 30               | 30             | 20           | 10           | 10             | 3.0          |
| HSN <sub>60</sub> -SCL   | 30               | 30             | 20           | 10           | 10             | 1.0          |
| HSN <sub>100</sub> -SCL  | 30               | 30             | 20           | 10           | 10             | 1.0          |

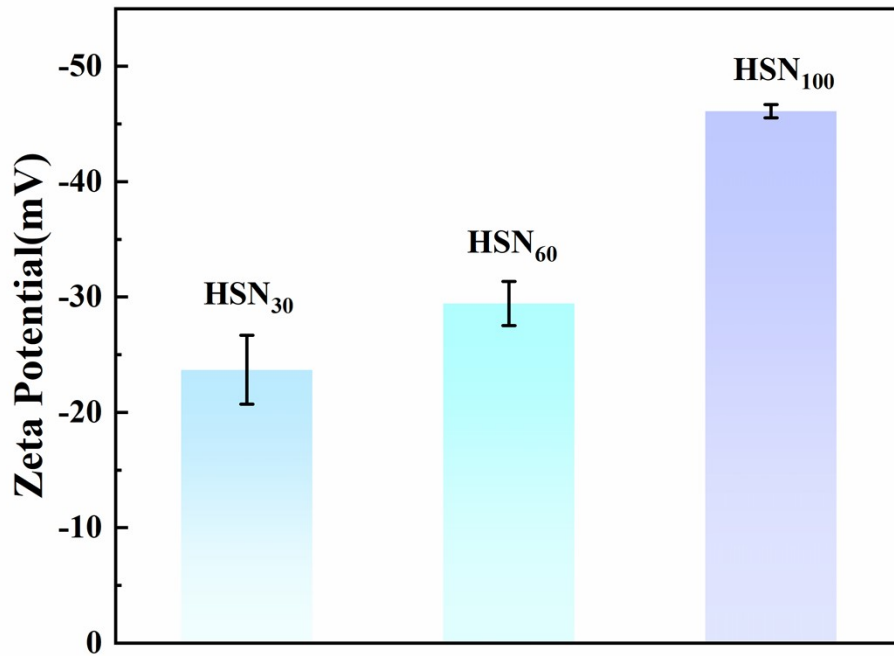

Figure S1. Zeta potentials of hollow silica nanoparticles with different sizes

**Table S2.** Data of LVF loaded ( $\mu\text{g}/\text{lens}$ ), LVF released ( $\mu\text{g}/\text{lens}$ ) and LVF released (%) from SCL and HSN<sub>30</sub>-SCL samples

| Sample                   | LVF loaded ( $\mu\text{g}/\text{lens}$ ) | LVF released ( $\mu\text{g}/\text{lens}$ ) | LVF released (%) |
|--------------------------|------------------------------------------|--------------------------------------------|------------------|
| SCL                      | 57.1                                     | 51.7                                       | 90.5             |
| HSN <sub>30</sub> -SCL-1 | 81.2                                     | 71.3                                       | 87.7             |
| HSN <sub>30</sub> -SCL-2 | 136.5                                    | 116.4                                      | 85.3             |
| HSN <sub>30</sub> -SCL-3 | 197.7                                    | 160.9                                      | 81.4             |

---

**HSN<sub>30</sub>-SCL-4**

253.2

201.3

79.5

---
